# Supplementary material for: Tin oxide-coated transition metal oxide molecular wires for biomass conversion
Source: Royal Society of Chemistry journal article supplement (doi:10.1039/d0nj00400f), 2020-01-01
Supplement: d0nj00400f1.pdf [file d0nj00400f1.pdf]

**New Journal of Chemistry**

**Supporting information**

**Tin oxide coated transition metal oxide molecular wires for biomass conversion**

Zhenxin Zhang,<sup>a\*</sup> Haruka Tateno,<sup>b</sup> Michikazu Hara,<sup>c</sup> Wataru Ueda<sup>b\*</sup>

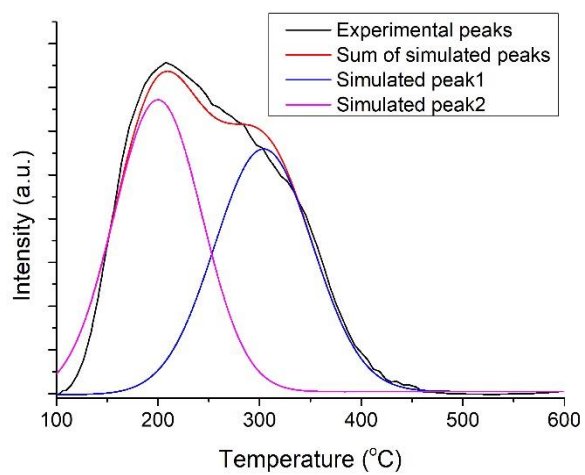

Figure S1. NH<sub>3</sub>-TPD profile of **SnWSeO**.

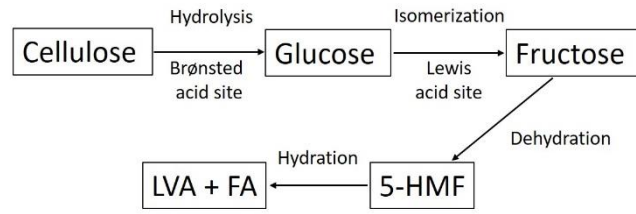

Figure S2. The proposed reaction mechanism of LVA production from cellulose.

Table S1. Yield of each products from cellulose catalyzed by SnO<sub>2</sub> and reused catalysts

| Catalyst                | Glucose (%) | Mannose (%) | FA (%) | AA (%) | HMF (%) | LVA (%) | Total (%) |
|-------------------------|-------------|-------------|--------|--------|---------|---------|-----------|
| Reused<br><b>SnWTeO</b> | 0.8         | 0.3         | 2.1    | 0.9    | 0.6     | 6.8     | 11.6      |
| SnO <sub>2</sub>        | 0           | 0           | 0.1    | 0      | 0.1     | 0       | 0.2       |

Reaction conditions: cellulose: 0.05 g, catalyst: 0.05 g, water 0.5 mL, 175 °C, 8 h.

Table S2. Catalytic activities of different catalysts.

| Catalyst                                                            | Catalyst weight (g)<br>/cellulose weight (g) | Solvent  | T<br>(°C) | t (h) | LVA<br>yield(%) | Ref.         |
|---------------------------------------------------------------------|----------------------------------------------|----------|-----------|-------|-----------------|--------------|
| D008                                                                | 1.2/0.5                                      | Water    | 110       | 2     | 0               | 1            |
| Amberlyst-70                                                        | 3/1                                          | Water    | 258       | 16    | 19              | 2            |
| H-ZSM-5                                                             | 0.4/0.5                                      | Water    | 180       | 24    | ca. 28          | 3            |
| Al-NbOPO <sub>4</sub>                                               | 0.4/0.5                                      | Water    | 180       | 24    | ca. 50          | 3            |
| Fe/HY                                                               | 0.1/0.1                                      | BMIMBr   | 140       | 5     | ca. 11          | 4            |
| ChH <sub>4</sub> AlW <sub>12</sub> O <sub>40</sub>                  | 0.239/0.1                                    | Water    | 120       | 10    | 6.4             | 5            |
| Ga <sub>2</sub> O <sub>3</sub> -UiO-66                              | 0.125/5                                      | Water    | 240       | 6     | ca. 32          | 6            |
| 5-F-SHPAOs                                                          | 0.039/0.04                                   | Water    | 165       | 5     | 47              | 7            |
| Al <sub>2</sub> (SO <sub>4</sub> ) <sub>3</sub> ·18H <sub>2</sub> O | 0.2/0.34                                     | methanol | 160       | 5     | 5.9             | 8            |
| <b>SnWTeO</b>                                                       | 0.05/0.05                                    | Water    | 175       | 8     | 26              | This<br>work |
| <b>SnWSeO</b>                                                       | 0.05/0.05                                    | Water    | 175       | 8     | 25.2            | This<br>work |

## Reference:

1. C. Ming, K. Sun, Y. Shao, Z. Zhang, S. Zhang, Q. Liu, Y. Wang, S. Hu, J. Xiang, and X. Hu, *Energy & Fuels*, 2019, **33**, 11187–11199.
2. D. M. Alonso, M. R. Gallo, M. A. Mellmer, S. G. Wettstein, and J. A. Dumesic, *Catal. Sci. Technol.*, 2013, **3**, 927–931.
3. D. Ding, J. Wang, J. Xi, X. Liu, G. Lu, and Y. Wang, *Green Chem.*, 2014, **16**, 3846–3853.
4. N. Aainaa, S. Ramli, N. Aishah, and S. Amin, *Fuel Process. Technol.*, 2014, **128**, 490–498.
5. Z. Suna, L. Xuea, S. Wang, X. Wang, and J. Shi, *Green Chem.*, 2016, **18**, 742–752.
6. K. Wang, Y. Liu, W. Wu, Y. Chen, L. Fang, W. Li, and H. Ji, *Catal. Letters*, 2020, **150**, 322–331.
7. F. Yu, J. Thomas, S. Van de Vyver, M. Smet, W. Dehaen, and B. F. Sels, *Green Chem.*, 2016, **18**, 1694–1705.
8. L. Zhou, D. Gao, J. Yang, X. Yang, Y. Su, and T. Lu, *Cellulose*, 2020, **27**, 1451–1463.
